# Supplementary material
Source: MDPI journal article supplement (https://www.mdpi.com/2220-9964/9/4/271)
Supplement: s1 [file s1]

**Table S1.** Main characteristics of reviewed studies

| Author                                                          | Year | Title                                                                                                   | Field                         | Country          | Respondents                             | Scale     | Criteria*   | Factors                                                                                 | Methods                                                           |
|-----------------------------------------------------------------|------|---------------------------------------------------------------------------------------------------------|-------------------------------|------------------|-----------------------------------------|-----------|-------------|-----------------------------------------------------------------------------------------|-------------------------------------------------------------------|
| <b>Anacta, Schwering, Li, &amp; Muenzer</b> [145 <sup>*</sup> ] | 2017 | Orientation information in wayfinding instructions: evidences from human verbal and visual instructions | geography, psychology         | Germany, USA     | college students                        | route map | CF          | content of the map                                                                      | draw from memory                                                  |
| <b>Appleyard</b> [74]                                           | 1970 | Styles and Methods of Structuring a City                                                                | architecture and city planner | USA              | adults (non – students) <20, 20-30, >30 | town      | PA, CF, CCM | age, gender, level of education, socioeconomic status, familiarity of place             | draw from memory                                                  |
| <b>Bahrck</b> [132]                                             | 1983 | The Cognitive Map of a City: Fifty Years of Learning and Memory                                         | psychology                    | USA              | adults (non – students)                 | town      | CF          | gender, length of stay                                                                  | draw from memory                                                  |
| <b>Bailly, MacCabe, &amp; Saarinen</b> [96]                     | 1995 | Images of francophone countries and francophone images of the world                                     | geography                     | USA, Switzerland | college students                        | world     | CF          | place of residence, familiarity of place, shape of region, size of region               | draw from memory                                                  |
| <b>Beatty &amp; Tröster</b> [75]                                | 1987 | Gender differences in geographical knowledge                                                            | unknown                       | USA              | college students                        | region    | CF, PA      | gender, map reading, mobility, place of residence, level of education, content of media | draw from memory (experiment 5), learning from map (experiment 3) |
| <b>Blades</b> [7]                                               | 1990 | The reliability of data collected from sketch maps                                                      | psychology                    | United Kingdom   | college students (age 18-42)            | route map | CF          | age, gender, familiarity of place                                                       | draw from memory                                                  |
| <b>Bomfim &amp; Urrutia</b> [102]                               | 2005 | Affective dimension in cognitive maps of Barcelona and São Paulo                                        | unknown                       | Brazil, Spain    | college students                        | town      | CF          | familiarity of place                                                                    | draw from memory                                                  |

\* PA – positional accuracy  
 CF – content frequency  
 CCM – choice of cartographic methods

|                                                           |      |                                                                                                          |                |                 |                  |           |        |                                                              |                                              |
|-----------------------------------------------------------|------|----------------------------------------------------------------------------------------------------------|----------------|-----------------|------------------|-----------|--------|--------------------------------------------------------------|----------------------------------------------|
| <b>Çanakcioğlu [113]</b>                                  | 2015 | Can cognitive maps of children be analysed by space syntax?                                              | engineering    | Turkey          | unknown          | local     | CF     | gender, socioeconomic status                                 | draw from memory                             |
| <b>Casey [121]</b>                                        | 2002 | Remembering what we do, not what we view: The plasticity of everyday cognitive maps                      | social science | Australia       | college students | route map | PA, CF | learning from environment, learning from map                 | learning from environment, learning from map |
| <b>Chiodo [126]</b>                                       | 1993 | Mental Maps: Preservice Teachers' Awareness of the World                                                 | education      | USA             | college students | world     | PA, CF | gender, level of education, cartographic projection          | draw from memory                             |
| <b>Chiodo [59]</b>                                        | 1997 | Improving the Cognitive Development of Students' Mental Maps of the World                                | education      | USA             | secondary school | world     | PA, CF | development of sketch map                                    | teaching                                     |
| <b>Cho [150<sup>*</sup>]</b>                              | 2010 | The role of IQ in the use of cognitive strategies to learn information from a map                        | education      | USA             | secondary school | local     | CF     | intelligence                                                 | draw from memory                             |
| <b>Chokor [93]</b>                                        | 2003 | Pattern of representation of countries in cognitive maps of the world with special reference to Africa   | geography      | Benin           | college students | world     | CF     | mobility, economic maturity, size of region, shape of region | draw from memory                             |
| <b>Coluccia, Iosue, &amp; Antonella Brandimonte [131]</b> | 2007 | The relationship between map drawing and spatial orientation abilities: A study of gender differences    | psychology     | Italy           | college students | local     | PA, CF | gender                                                       | learning from map                            |
| <b>Denis &amp; Zimmere [114]</b>                          | 1992 | Analog properties of cognitive maps constructed from verbal descriptions                                 | psychology     | France, Germany | college students | region    | PA, CF | learning from text, learning from map                        | learning from map, learning from text        |
| <b>Dickmann [120]</b>                                     | 2012 | City Maps Versus Map-Based Navigation Systems – An Empirical Approach to Building Mental Representations | geography      | Germany         | college students | route map | PA, CF | learning from navigation, learning from map                  | learning from navigation, learning from map  |

|                                                        |      |                                                                                                                      |                               |                |                                                      |       |             |                                                                                               |                                       |
|--------------------------------------------------------|------|----------------------------------------------------------------------------------------------------------------------|-------------------------------|----------------|------------------------------------------------------|-------|-------------|-----------------------------------------------------------------------------------------------|---------------------------------------|
| <b>Drumheller [48]</b>                                 | 1968 | Conjure Up A Map— A Crucial But Much Neglected Skill                                                                 | education                     | USA            | secondary school (grade 6), college students, adults | world | PA          | age, drawing skills                                                                           | draw from memory                      |
| <b>Evans, Marrero, &amp; Butler [105]</b>              | 1981 | Environmental Learning and Cognitive Mapping                                                                         | social ecology                | USA            | college students                                     | town  | PA, CF      | familiarity of place, regularity of place, frequency of landmark                              | draw from memory                      |
| <b>Ferguson &amp; Hegarty [115]</b>                    | 1994 | Properties of cognitive maps constructed from texts                                                                  | unknown                       | USA            | college students                                     | town  | PA, CF      | learning from map, structure of text, type of text                                            | learning from map, learning from text |
| <b>Gillespie [146*]</b>                                | 2010 | How Culture Constructs Our Sense of Neighborhood: Mental Maps and Children's Perceptions of Place                    | geography                     | USA            | primary school                                       | local | PA, CF      | cultural differences                                                                          | draw from memory                      |
| <b>Golledge &amp; Spector [110]</b>                    | 1978 | Comprehending the Urban Environment: Theory and Practice                                                             | geography                     | USA            | adults                                               | town  | CF          | socioeconomic status                                                                          | draw from memory                      |
| <b>Goodehild [112]</b>                                 | 1974 | Class Differences in Environmental Perception: an exploratory study                                                  | architecture and city planner | United Kingdom | adults                                               | town  | PA, CF, CCM | gender, socioeconomic status                                                                  | draw from memory                      |
| <b>Gourley, Saarinen, &amp; MacCabe [106]</b>          | 1993 | Comparison of Sketch Maps Drawn by Students from Armidale, Australia and Dunedin, New Zealand                        | geography                     | USA            | college students                                     | world | PA, CF      | gender, nationality, economic maturity, place of residence, content of geographical education | draw from memory                      |
| <b>Greenberg Raanan &amp; Shoval [149<sup>†</sup>]</b> | 2014 | Mental maps compared to actual spatial behavior using GPS data: A new method for investigating segregation in cities | geography                     | Israel         | college students                                     | town  | CF          | cultural differences (arab, jewish)                                                           | draw from memory                      |

|                                                     |      |                                                                                                 |                |                |                            |        |         |                                                                  |                  |
|-----------------------------------------------------|------|-------------------------------------------------------------------------------------------------|----------------|----------------|----------------------------|--------|---------|------------------------------------------------------------------|------------------|
| <b>Grieve &amp; van Staden</b> [111]                | 1988 | A Cross-Cultural Study of Children's Cognitive Maps                                             | psychology     | South Africa   | primary school             | town   | CF, CCM | age, gender, race, socioeconomic status                          | draw from memory |
| <b>Gutsche</b> [147]                                | 2014 | News place-making: applying 'mental mapping' to explore the journalistic interpretive community | journalist     | USA            | adults                     | town   | CF      | employment (journalist, office, resident)                        | draw from memory |
| <b>Harwood &amp; Rawlings</b> [58]                  | 2001 | Assessing Young Children's Freehand Sketch Maps of the World                                    | unknown        | United Kingdom | primary school             | world  | PA, CF  | development of sketch map                                        | teaching         |
| <b>Herman, Hawkins, Barron, &amp; Berryman</b> [89] | 1988 | World Place Location Skills of Elementary School Students                                       | education      | USA            | primary school (grade 4-6) | world  | CF      | age, gender, intelligence, socioeconomic status, mobility        | draw from memory |
| <b>Hussein Snaf</b> [103]                           | 1991 | College students' cognition of the Arab World map                                               | education      | Saudi Arabi    | college students           | region | CF      | attitudes, familiarity of place                                  | draw from memory |
| <b>Huynh, Doherty, &amp; Sharpe</b> [70]            | 2010 | Gender Differences in the Sketch Map Creation Process                                           | geography      | USA, Canada    | adults                     | local  | CF      | gender                                                           | draw from memory |
| <b>Jenkins &amp; Walmsley</b> [90]                  | 1993 | Mental maps of tourists: A study of Coffs Harbour, New South Wales                              | geography, art | Australia      | adults                     | local  | CF      | mobility                                                         | draw from memory |
| <b>Karan &amp; Bladen</b> [94]                      | 1982 | Perception of the Urban Environment in a Third-World Country                                    | unknown        | USA            | adults                     | town   | PA, CF  | mobility, place of residence, length of stay, level of education | draw from memory |
| <b>Kask &amp; Hannust</b> [95]                      | 2013 | Does a Dozen Years Change a Thing? Estonian Children's Drawings of Europe in 2000 and 2012      | public law     | Estonia        | primary school             | region | PA      | mobility                                                         | draw from memory |

|                                                    |      |                                                                                                                                                    |                              |                |                                          |        |             |                                                           |                                       |
|----------------------------------------------------|------|----------------------------------------------------------------------------------------------------------------------------------------------------|------------------------------|----------------|------------------------------------------|--------|-------------|-----------------------------------------------------------|---------------------------------------|
| <b>Kitchin</b> [134]                               | 1996 | Are There Sex Differences in Geographic Knowledge and Understanding?                                                                               | geography                    | United Kingdom | college students                         | region | PA, CF      | gender, content of geographical education                 | draw from memory                      |
| <b>Kong, Savage, Saarinen, &amp; Maccabe</b> [100] | 1994 | Mental Maps of the World: The Case of Singapore Students                                                                                           | geography                    | Singapore, USA | college students                         | world  | PA, CF      | place of residence, content of textbooks, size of region  | draw from memory                      |
| <b>Lee &amp; Schmidt</b> [83]                      | 1986 | Urban Spatial Cognition: A Case Study of Guangzhou, China                                                                                          | regional planning, geography | USA            | college students                         | town   | CF, CCM     | age, gender, place of residence                           | draw from memory                      |
| <b>Lloyd</b> [86]                                  | 1989 | Cognitive Maps: Encoding and Decoding Information                                                                                                  | geography                    | USA            | college students                         | town   | PA          | learning from environment, learning from map, map reading | learning from map                     |
| <b>Long &amp; Baran</b> [151 <sup>*</sup> ]        | 2012 | Does Intelligibility Affect Place Legibility? Understanding the Relationship Between Objective and Subjective Evaluations of the Urban Environment | architecture                 | China, USA     | college students                         | town   | CF          | legibility of place                                       | learning from environment             |
| <b>Louwerse &amp; Benesh</b> [118]                 | 2012 | Representing Spatial Structure Through Maps and Language: Lord of the Rings Encodes the Spatial Structure of Middle Earth                          | psychology                   | USA            | college students                         | region | PA          | learning from text, learning from map                     | learning from map, learning from text |
| <b>MacEachren</b> [87]                             | 1991 | The role of maps in spatial knowledge acquisition                                                                                                  | geography                    | USA            | college students                         | region | PA          | map reading                                               | learning from map                     |
| <b>Madaleno</b> [98]                               | 2010 | How Do Remote Southern Hemisphere Residents Perceive the World? Mental Maps Drawn by East Timorese and Mozambican Islanders                        | nature science               | Portugal       | Primary school, secondary school         | world  | PA, CF      | place of residence, content of textbooks, colonial past   | draw from memory                      |
| <b>Matthews</b> [71]                               | 1980 | Children Represent their Environment: Mental Maps of Coventry City Centre                                                                          | geography                    | United Kingdom | secondary school (grade 6–12, age 11–18) | town   | PA, CF, CCM | age                                                       | draw from memory                      |

|                                                            |      |                                                                                                                               |            |                |                                       |           |             |                                                                                |                                            |
|------------------------------------------------------------|------|-------------------------------------------------------------------------------------------------------------------------------|------------|----------------|---------------------------------------|-----------|-------------|--------------------------------------------------------------------------------|--------------------------------------------|
| <b>Matthews [8]</b>                                        | 1984 | Cognitive Mapping Abilities of Young Boys and Girls                                                                           | geography  | United Kingdom | primary school, (grade 1–7, age 6–11) | local     | PA, CF, CCM | age, gender                                                                    | draw from memory                           |
| <b>Matthews [71]</b>                                       | 1984 | Environmental Cognition of Young Children: Images of Journey to School and Home Area                                          | geography  | United Kingdom | primary school (grade 1–5, age 6–11)  | local     | PA, CF, CCM | age                                                                            | draw from memory                           |
| <b>Matthews [77]</b>                                       | 1986 | Gender, Graphicacy and Geography                                                                                              | geography  | United Kingdom | primary school (grade 1 – 5)          | local     | PA, CCM     | gender                                                                         | draw from memory                           |
| <b>Meneghetti, Borella, Gyselinck, &amp; De Beni [116]</b> | 2012 | Age-differences in environment route learning: The role of input and recall-test modalities in young and older adults         | psychology | Italy, France  | adults                                | route map | PA, CF      | age, learning from text, learning from map                                     | learning from map, learning from text      |
| <b>Meneghetti, Fiore, Borella, &amp; De Beni [136]</b>     | 2011 | Learning a map of environment: The role of visuo-spatial abilities in young and older adults                                  | psychology | Italy          | adults (age 20-30 and 60-72)          | town      | CF          | age, mental rotation, spatial perception, spatial visualization                | learning from map                          |
| <b>Meneghetti, Muffato, Varotto, &amp; De Beni [128]</b>   | 2017 | How directions of route descriptions influence orientation specificity: the contribution of spatial abilities                 | psychology | Italy          | college students                      | route map | PA          | mental rotation, spatial perception, orientation of map                        | learning from map, learning from listening |
| <b>Meneghetti, Pazzaglia, &amp; De Beni [137]</b>          | 2015 | Mental representations derived from spatial descriptions: the influence of orientation specificity and visuospatial abilities | psychology | Italy          | college students                      | local     | CF          | mental rotation, spatial perception, spatial visualization, orientation of map | learning from listening                    |
| <b>Meneghetti et al. [45]</b>                              | 2016 | Mental representations derived from navigation: The role of visuo-spatial abilities and working memory                        | psychology | Italy, Spain   | college students (women)              | town      | CF          | mental rotation, spatial perception, spatial visualization                     | learning from navigation                   |
| <b>Metz [49]</b>                                           | 1990 | Sketch Maps: Helping Students Get the Big Picture                                                                             | unknown    | USA            | college students                      | world     | PA, CF      | content of school atlases, teaching style                                      | learning from map, teaching                |

|                                                           |      |                                                                                                                                                     |                                     |                |                          |                                |         |                                                                                |                                              |
|-----------------------------------------------------------|------|-----------------------------------------------------------------------------------------------------------------------------------------------------|-------------------------------------|----------------|--------------------------|--------------------------------|---------|--------------------------------------------------------------------------------|----------------------------------------------|
| <b>Mondschein, Blumenberg, &amp; Taylor</b> [125]         | 2010 | Accessibility and Cognition: The Effect of Transport Mode on Spatial Knowledge                                                                      | urban planning                      | USA            | adults                   | route map                      | PA, CF  | age, gender, race, level of education, familiarity of place, mode of transport | draw from memory                             |
| <b>Montello, Lovelace, Golledge, &amp; Self</b> [76]      | 1999 | Sex-Related Differences and Similarities in Geographic and Environmental Spatial Abilities                                                          | psychology, geography, anthropology | USA            | adults                   | route map, world               | PA, CF  | gender, map reading                                                            | learning from environment, learning from map |
| <b>Muffato, Meneghetti, Di Ruocco, &amp; De Beni</b> [84] | 2017 | When young and older adults learn a map: The influence of individual visuo-spatial factors                                                          | psychology                          | Italy          | adults                   | local                          | PA, CF  | age, mental rotation, spatial perception, spatial visualization, map reading   | learning from map                            |
| <b>Murray &amp; Spencer</b> [92]                          | 1979 | Individual Differences in the Drawing of Cognitive Maps: The Effects of Geographical Mobility, Strength of Mental Imagery and Basic Graphic Ability | psychology                          | United Kingdom | college students, adults | route map, town, region, world | CF, CCM | drawing skills, mobility                                                       | draw from memory                             |
| <b>Nieścioruk</b> [140]                                   | 2016 | The Use of Mental and Sketch Maps as a Tool to Evaluate Cartography Teaching Effectiveness                                                          | geography                           | Poland         | college students         | local                          | CF, CCM | gender, content of geographical education                                      | teaching                                     |
| <b>Okabayashi &amp; Glynn</b> [88]                        | 1984 | Spatial Cognition: Systematic Distortions in Cognitive Maps                                                                                         | psychology                          | USA            | college students         | world                          | PA      | map reading, orientation of map, segmentation boundary                         | learning from map                            |
| <b>Pearce</b> [135]                                       | 1977 | Mental Souvenirs: A Study of Tourists and their City Maps                                                                                           | psychology                          | United Kingdom | adults                   | town                           | PA, CF  | gender, length of stay, place of residence                                     | draw from memory                             |
| <b>Pearson &amp; Ialongo</b> [129]                        | 1986 | The relationship between spatial ability and environmental knowledge                                                                                | psychology                          | USA            | college students         | route map                      | PA      | mental rotation, spatial perception, spatial visualization                     | learning from map                            |
| <b>Pinheiro</b> [148]                                     | 1998 | Determinants of Cognitive Maps of the World as Expressed in Sketch Maps                                                                             | psychology                          | Brazil         | college students         | world                          | CF      | place of residence, content of media, size of region, economic maturity        | draw from memory                             |

|                                                              |      |                                                                                                                                         |                       |                   |                                    |        |         |                                                                           |                                       |
|--------------------------------------------------------------|------|-----------------------------------------------------------------------------------------------------------------------------------------|-----------------------|-------------------|------------------------------------|--------|---------|---------------------------------------------------------------------------|---------------------------------------|
| <b>Pocock [41]</b>                                           | 1976 | Some Characteristics of Mental Maps: An Empirical Study                                                                                 | geography             | United Kingdom    | adults                             | town   | CF, CCM | age, gender, length of stay, socioeconomic status, familiarity of place   | draw from memory                      |
| <b>Potter [82]</b>                                           | 1985 | The Development of Spatial Cognitive Maps among Barbadian Children                                                                      | geography             | United Kingdom    | secondary school (age 13-16)       | region | CF, CCM | age                                                                       | draw from memory                      |
| <b>Quaiser-Pohl, Lehmann, &amp; Eid [138]</b>                | 2004 | The relationship between spatial abilities and representations of large-scale space in children—a structural equation modeling analysis | psychology            | Germany           | primary school                     | local  | CF      | mental rotation, spatial perception                                       | draw from memory                      |
| <b>Ramadier &amp; Bronner [130]</b>                          | 2006 | Knowledge of the Environment and Spatial Cognition: JRS as a Technique for Improving Comparisons between Social Groups                  | unknown               | France            | college students                   | town   | CF      | level of education                                                        | draw from memory                      |
| <b>Ramadier &amp; Moser [107]</b>                            | 1998 | Social Legibility, The Cognitive Map and Urban Behaviour                                                                                | psychology            | France            | secondary school, college students | town   | PA, CF  | nationality, activities in space                                          | draw from memory                      |
| <b>Reynolds &amp; Vinterek [123]</b>                         | 2016 | Geographical locational knowledge as an indicator of children's views of the world: research from Sweden and Australia                  | education             | Australia, Sweden | primary school                     | world  | CF      | age, place of residence, colonial past, content of geographical education | draw from memory                      |
| <b>Rittschof, Stock, Kulhavy, Verdi, &amp; Doran [104]</b>   | 1994 | Thematic Maps Improve Memory for Facts and Inferences: A Test of the Stimulus Order Hypothesis                                          | unknown               | USA               | college students                   | region | PA      | learning from text, learning from map                                     | learning from map, learning from text |
| <b>Rittschof, Stock, Kulhavy, Verdi, &amp; Johnson [119]</b> | 1996 | Learning from Cartograms: The Effects of Region Familiarity                                                                             | education, psychology | USA               | college students                   | region | PA, CF  | familiarity of place, cartographic method                                 | learning from map                     |
| <b>Saarinen [42]</b>                                         | 1988 | Centering of mental maps of the world                                                                                                   | geography             | USA               | college students                   | world  | PA      | place of residence, content of textbooks                                  | draw from memory                      |



|                                                    |      |                                                                                                                                                    |            |                         |                                                            |              |         |                                                                   |                                       |
|----------------------------------------------------|------|----------------------------------------------------------------------------------------------------------------------------------------------------|------------|-------------------------|------------------------------------------------------------|--------------|---------|-------------------------------------------------------------------|---------------------------------------|
| <b>Saarinen &amp; MacCabe</b> [73]                 | 1995 | World Patterns of Geographic Literacy Based on Sketch Map Quality                                                                                  | geography  | USA                     | college students                                           | world        | CF      | nationality                                                       | draw from memory                      |
| <b>Saarinen, Parton, &amp; Billberg</b> [99]       | 1996 | Relative Size of Continents on World Sketch Maps                                                                                                   | geography  | USA                     | college students                                           | world        | PA      | place of residence, content of textbooks, cartographic projection | draw from memory                      |
| <b>Sanders &amp; Porter</b> [62]                   | 1974 | Shape in Revealed Mental Maps                                                                                                                      | geography  | USA                     | college students                                           | region       | PA      | place of residence                                                | draw from memory                      |
| <b>Seibert &amp; Anooshian</b> [142]               | 1993 | Indirect Expression of Preference in Sketch Maps                                                                                                   | psychology | USA                     | primary school, secondary school, college students, adults | local        | CF      | emotion                                                           | draw from memory                      |
| <b>Schmeinck &amp; Thurston</b> [91]               | 2007 | The influence of travel experiences and exposure to cartographic media on the ability of ten-year-old children to draw cognitive maps of the world | education  | Germany, United Kingdom | primary school                                             | world        | CF      | gender, experience with mapping, mobility                         | draw from memory                      |
| <b>Shin</b> [124]                                  | 2006 | Using Geographic Information System (GIS) to Improve Fourth Graders' Geographic Content Knowledge and Map Skills                                   | education  | USA                     | students (not specified)                                   | town, region | CF      | familiarity of place, content of geographical education           | learning from GIS                     |
| <b>Singh</b> [108]                                 | 1982 | Image of Varanasi City: Reflections on Geography of Tourism                                                                                        | geography  | India                   | adults                                                     | town         | PA, CF  | nationality                                                       | draw from memory                      |
| <b>Spencer &amp; Weetman</b> [72]                  | 1981 | The microgenesis of cognitive maps: a longitudinal study of new residents of an urban area                                                         | psychology | United Kingdom          | college students                                           | town         | CF, CCM | gender                                                            | draw from memory                      |
| <b>Stock, Peterson, Hancock, &amp; Verdi</b> [117] | 1995 | Mental Representations of Maps and Verbal Descriptions: Evidence They May Affect Text Memory Differently                                           | unknown    | USA                     | college students                                           | region       | PA, CF  | learning from text, learning from map                             | learning from map, learning from text |

|                                                                 |      |                                                                                                                              |            |                |                              |               |         |                                                                                                                                  |                           |
|-----------------------------------------------------------------|------|------------------------------------------------------------------------------------------------------------------------------|------------|----------------|------------------------------|---------------|---------|----------------------------------------------------------------------------------------------------------------------------------|---------------------------|
| <b>Thomas &amp; Willinsky</b> [101]                             | 1999 | Grounds for Imagining a Pacific Community: Mapping Across Boundaries and Great Divides                                       | education  | Canada         | secondary school             | world         | PA, CF  | nationality, content of geographical education                                                                                   | draw from memory          |
| <b>Thommen, Avelar, Sapin, Perrenoud, &amp; Malatesta</b> [109] | 2010 | Mapping the journey from home to school: a study on children's representation of space                                       | education  | Switzerland    | primary school               | route map     | CF, CCM | age, gender, nationality, level of education                                                                                     | draw from memory          |
| <b>Torrens</b> [85]                                             | 2001 | Where in the world? Exploring the factors driving place location knowledge among secondary level students in Dublin, Ireland | geography  | Ireland        | secondary school             | region, world | PA, CF  | age, gender, mobility, place of residence, level of education, socioeconomic status, content of media                            | draw from memory          |
| <b>Tversky</b> [122]                                            | 1981 | Distortions in memory for maps                                                                                               | psychology | United Kingdom | adults                       | town          | PA      | learning from environment, learning from map                                                                                     | learning from map         |
| <b>Walmsley, Saarinen, &amp; MacCabe</b> [66]                   | 1990 | Down under or centre stage? The world images of Australian students                                                          | geography  | Australia, USA | college students             | world         | PA, CF  | place of residence, content of media, content of school atlases, migration, economic maturity, content of geographical education | draw from memory          |
| <b>Webley</b> [133]                                             | 1981 | Sex differences in home range and cognitive maps in eight-year old children                                                  | psychology | United Kingdom | primary school               | town          | CF      | gender, intelligence                                                                                                             | learning from environment |
| <b>Whittaker J. O. &amp; Whittaker S. J.</b> [68]               | 1972 | A Cross-Cultural Study of Geocentrism                                                                                        | unknown    | USA            | college students             | world         | PA      | place of residence, cartography projection, content of geographical education                                                    | draw from memory          |
| <b>Wiegand</b> [9]                                              | 1995 | Young children's freehand sketch maps of the world                                                                           | education  | United Kingdom | kindergarten, primary school | world         | PA, CF  | age, economic maturity, shape of region                                                                                          | draw from memory          |

|                                   |      |                                                                        |           |                |                                  |        |        |                                                                              |                  |
|-----------------------------------|------|------------------------------------------------------------------------|-----------|----------------|----------------------------------|--------|--------|------------------------------------------------------------------------------|------------------|
| <b>Wiegand [11]</b>               | 1998 | Children's Free Recall Sketch Maps of the World on a Spherical Surface | education | United Kingdom | primary school                   | world  | PA, CF | age, gender, segmentation boundary                                           | draw from memory |
| <b>Wiegand &amp; Stiell [127]</b> | 1997 | Mapping the Place Knowledge of Teachers in Training                    | education | United Kingdom | college students                 | region | PA     | gender, place of residence, level of education, segmentation boundary, scale | draw from memory |
| <b>Wiegand &amp; Stiell [97]</b>  | 1997 | The Development of Children's Sketch Maps of the British Isles         | education | United Kingdom | primary school, secondary school | region | PA     | age, gender, place of residence, cartographic method                         | draw from memory |
| <b>Wise &amp; Kon [69]</b>        | 1990 | Assessing Geographic Knowledge with Sketch Maps                        | unknown   | USA            | primary school                   | world  | PA, CF | cartographic projection, development of the sketch map                       | teaching         |
